# Supplementary material
Source: publisher site journal article supplement (https://www.spandidos-publications.com/8378/downloadSupplementary)
Supplement: Supplementary file 1 [file downloadSupplementary]

## Sheet: Sheet1
Table SI. Clinical information of the 50 patients with ESCC in the Affiliated Hospital of North Sichuan Medical College (Sichuan, China).
Sample ID	Sex	Age	History of smoking	History of alcohol consumption	Location	Histological grade	TNM stage	T stage	N stage	M stage	ESCC IRS score	Paracancer IRS score
ESCC_1	Man	≥60	Yes	Yes	Upper	G3	IIA	T2	N0	M0	1	1.33333
ESCC_2	Man	≥60	No	No	Middle	G2	IB	T1	N0	M0	1	3.33333
ESCC_3	Woman	≥60	No	No	Middle	G2	IIIB	T3	N1	M0	1	2.66667
ESCC_4	Man	≥60	Yes	Yes	Middle	G1	IA	T1	N0	M0	1.33333	1
ESCC_5	Woman	<60	Yes	Yes	Middle	G1	IIIA	T2	N1	M0	1.66667	1.66667
ESCC_6	Woman	<60	No	No	Middle	G2	IB	T1	N0	M0	1.66667	4.66667
ESCC_7	Man	≥60	No	No	Middle	G1	IA	T1	N0	M0	2	4.66667
ESCC_8	Man	≥60	No	Yes	Middle	G2	IIA	T2	N0	M0	2	1.33333
ESCC_9	Man	≥60	No	Yes	Lower	G2	IIIB	T3	N2	M0	2	2.66667
ESCC_10	Man	≥60	Yes	Yes	Middle	G2	IB	T1	N0	M0	2	4
ESCC_11	Man	≥60	No	No	Upper	G2	IB	T1	N0	M0	2	3.33333
ESCC_12	Woman	<60	No	No	Middle	G2	IIIA	T2	N1	M0	2.33333	1.66667
ESCC_13	Woman	≥60	Yes	No	Middle	G2	IIIB	T4	N1	M0	2.33333	4
ESCC_14	Man	≥60	Yes	No	Middle	G2	IIB	T1	N1	M0	2.66667	1
ESCC_15	Man	<60	Yes	No	Middle	G1	IB	T2	N0	M0	2.66667	1
ESCC_16	Man	≥60	Yes	No	Lower	G1	IB	T2	N0	M0	2.66667	2.66667
ESCC_17	Man	≥60	Yes	Yes	Middle	G2	IIIB	T4	N1	M0	2.66667	1.66667
ESCC_18	Man	≥60	Yes	Yes	Lower	G1	IIIA	T2	N1	M0	2.66667	4
ESCC_19	Man	≥60	No	No	Middle	G1	IIIB	T3	N1	M0	3	1.67
ESCC_20	Man	≥60	No	No	Upper	G1	IB	T2	N0	M0	3	4
ESCC_21	Woman	<60	No	No	Lower	G2	IIIB	T3	N1	M0	3	1
ESCC_22	Woman	<60	No	No	Middle	G1	IA	T1	N0	M0	3.33333	5.66667
ESCC_23	Man	<60	Yes	Yes	Lower	G2	IIIB	T3	N2	M0	3.33333	1
ESCC_24	Man	<60	Yes	Yes	Middle	G2	IB	T1	N0	M0	3.33333	1.33333
ESCC_25	Man	≥60	No	No	Middle	G2	IIIB	T3	N1	M0	3.33333	4
ESCC_26	Woman	<60	No	No	Middle	G2	IIB	T1	N1	M0	3.33333	4
ESCC_27	Man	≥60	Yes	Yes	Middle	G1	IVA	T4	N0	M0	4	4
ESCC_28	Woman	≥60	No	No	Middle	G1	IIIB	T3	N2	M0	4	4
ESCC_29	Man	≥60	No	Yes	Middle	G2	IIIB	T3	N1	M0	4	4
ESCC_30	Man	<60	Yes	No	Middle	G2	IVB	T3	N3	M1	4	4
ESCC_31	Woman	≥60	No	No	Middle	G2	IIA	T2	N0	M0	4	4
ESCC_32	Man	≥60	Yes	Yes	Lower	G2	IIIB	T4	N1	M0	4	2
ESCC_33	Man	≥60	No	No	Middle	G2	IIIA	T2	N1	M0	4	4
ESCC_34	Man	≥60	No	No	Middle	G1	IB	T2	N0	M0	4	3.33333
ESCC_35	Man	≥60	Yes	Yes	Middle	G1	IIIB	T4	N1	M0	4	4
ESCC_36	Woman	<60	No	No	Middle	G2	IIIB	T3	N1	M0	4	2
ESCC_37	Woman	≥60	No	No	Upper	G3	IIIB	T3	N2	M0	4	3.33333
ESCC_38	Man	<60	Yes	Yes	Middle	G2	IIA	T2	N0	M0	4.66667	1.33333
ESCC_39	Woman	<60	No	No	Middle	G2	IIB	T3	N0	M0	4.66667	1
ESCC_40	Man	<60	No	No	Middle	G1	IA	T1	N0	M0	4.66667	3.33333
ESCC_41	Man	≥60	Yes	Yes	Middle	G2	IB	T1	N0	M0	4.66667	1.33333
ESCC_42	Woman	<60	No	No	Middle	G1	IIA	T3	N0	M0	4.66667	4
ESCC_43	Man	≥60	Yes	Yes	Middle	G2	IIIB	T3	N2	M0	4.66667	4
ESCC_44	Woman	≥60	No	No	Lower	G2	IVA	T4	N3	M0	4.66667	2.66667
ESCC_45	Woman	≥60	No	No	Upper	G1	IVB	T3	N1	M1	4.66667	4
ESCC_46	Man	<60	Yes	Yes	Lower	G2	IIA	T2	N0	M0	5.33333	4
ESCC_47	Man	≥60	No	No	Upper	G2	IIIB	T3	N1	M0	5.33333	2.33333
ESCC_48	Woman	<60	No	No	Middle	G2	IIIB	T3	N1	M0	6	2.33333
ESCC_49	Man	≥60	No	No	Upper	G1	IB	T1	N0	M0	6	4
ESCC_50	Woman	<60	No	No	Middle	G2	IIIA	T2	N1	M0	8	1.66667
ESCC, esophageal squamous cell carcinoma; IRS, immunoreactive score.
